# Supplementary material
Source: PubMed Central journal article supplement (PMC8221450)
Supplement: NIHMS1591599-supplement-Supplemental_Table_1.pdf [file NIHMS1591599-supplement-Supplemental_Table_1.pdf]

**Supplemental Table 1. Association of baseline total B-vitamins intake with 6-year change in BMI among participants in WHIMS**

|                  | Tertiles for B vitamins intake* |             |             | p for trend |
|------------------|---------------------------------|-------------|-------------|-------------|
|                  | T1                              | T2          | T3          |             |
| Folate, mcg      | 0.16 ± 0.12                     | 0.33 ± 0.09 | 0.28 ± 0.13 | 0.34        |
| Vitamin B2, mg   | 0.18 ± 0.11                     | 0.20 ± 0.09 | 0.39 ± 0.11 | 0.24        |
| Vitamin B6, mg   | 0.14 ± 0.10                     | 0.31 ± 0.10 | 0.32 ± 0.11 | 0.32        |
| Vitamin B12, mcg | 0.06 ± 0.10                     | 0.33 ± 0.10 | 0.37 ± 0.10 | 0.04        |

\*plus-minus values are mean ± SD.

The general linear regression model was used to estimate the association between baseline total B vitamins intake with 6-year change in BMI after adjusting for age, total energy intake, physical activity, alcohol intake smoking, calcium and vitamin D intervention, diet modification intervention, alternative health index, and other B vitamins (mutually adjusted).
